# Supplementary material for: Facile liquid-phase exfoliated few-layer GeP nanosheets and their optoelectronic device applications
Source: Royal Society of Chemistry journal article supplement (doi:10.1039/d0tc00356e), 2020-01-01
Supplement: d0tc00356e1.pdf [file d0tc00356e1.pdf]

## Facile Liquid-Phase Exfoliated 2D GeP nanosheets for UV-Vis photodetector

Chao Li,<sup>a</sup> Jia Guo,<sup>a</sup> Yue Zhang,<sup>b</sup> Jianlong Kang,<sup>a</sup> Weichun Huang,<sup>c</sup> Tianyou Zhai\*<sup>b</sup> and Han Zhang\*<sup>a</sup>

a. Institute of Microscale Optoelectronics, Collaborative Innovation Centre for Optoelectronic Science & Technology, Key Laboratory of Optoelectronic Devices and Systems of Ministry of Education and Guangdong Province, College of Physics and Optoelectronic Engineering, Shenzhen Key Laboratory of Micro-Nano Photonic Information Technology, Guangdong Laboratory of Artificial Intelligence and Digital Economy (SZ), Shenzhen University, Shenzhen 518060, P.R. China, E-mail: hzhang@szu.edu.cn

b. State Key Laboratory of Material Processing and Die and Mould Technology, School of Materials Science and Engineering, Huazhong University of Science and Technology (HUST), Wuhan 430074, P. R. China, E-mail: zhaity@hust.edu.cn

c. College of Chemistry and Chemical Engineering, Nantong University, Nantong 226019, Jiangsu, P. R. China

**Table S1.** The light powder density ( $P_\lambda$ ) of the incident light with various irradiation wavelengths. The gradually increased  $P_\lambda$  were labelled with **I**, **II**, **III**, **IV**, and **VI** levels, respectively.

| $P_\lambda$ (mW/cm <sup>2</sup> ) | I level | II level | III level | IV level | VI level |
|-----------------------------------|---------|----------|-----------|----------|----------|
| Simulated light (SL)              | 26.2    | 53.0     | 83.1      | 118      | 122      |
| 350 nm                            | 0.61    | 1.52     | 2.52      | 3.26     | 3.41     |
| 365 nm                            | 0.76    | 1.66     | 2.55      | 3.57     | 3.69     |
| 380 nm                            | 0.32    | 1.02     | 1.91      | 2.68     | 2.77     |
| 400 nm                            | 0.64    | 2.04     | 3.57      | 5.22     | 5.35     |
| 475 nm                            | 1.91    | 4.33     | 7.01      | 10.1     | 10.6     |
| 550 nm                            | 2.04    | 3.95     | 5.98      | 8.28     | 8.40     |
| 650 nm                            | 2.04    | 4.08     | 6.02      | 8.54     | 8.92     |

**Table S2.** Typical parameters of 2D GeP nanosheets-based photodetector at 0.6 V applied bias potential and under 0.5 M KOH electrolyte.

| Wavelength<br>(nm) | Light intensity<br>( $P_{\lambda}$ , $\text{mW}\cdot\text{cm}^{-2}$ ) | Responsivity<br>( $R_{\text{ph}}$ , $\mu\text{A}\cdot\text{W}^{-1}$ ) | Detectivity<br>( $D^*$ , Jones) | EQE<br>(%) |
|--------------------|-----------------------------------------------------------------------|-----------------------------------------------------------------------|---------------------------------|------------|
|                    | 26.2                                                                  | 12.2                                                                  | $1.84 \times 10^5$              | -          |
|                    | 53.0                                                                  | 10.0                                                                  | $1.51 \times 10^5$              | -          |
| SL                 | 83.1                                                                  | 7.7                                                                   | $1.16 \times 10^5$              | -          |
|                    | 118                                                                   | 6.1                                                                   | $9.20 \times 10^4$              | -          |
|                    | 122                                                                   | 6.3                                                                   | $9.50 \times 10^4$              | -          |
| 350                | 0.61                                                                  | 82.0                                                                  | $7.89 \times 10^{11}$           | 29.1       |
| 365                | 0.76                                                                  | 92.1                                                                  | $1.00 \times 10^{12}$           | 31.3       |
| 380                | 0.32                                                                  | 187.5                                                                 | $2.14 \times 10^{12}$           | 61.3       |
| 400                | 0.64                                                                  | 93.8                                                                  | $1.11 \times 10^{12}$           | 29.2       |
| 475                | 1.91                                                                  | 31.4                                                                  | $3.68 \times 10^{11}$           | 8.2        |
| 550                | 2.04                                                                  | 9.8                                                                   | $1.21 \times 10^{11}$           | 2.2        |
| 650                | 2.04                                                                  | 8.3                                                                   | $1.04 \times 10^{11}$           | 1.6        |

**Table S3.** Comparison of the characteristic parameters of the 2D GeP nanosheets-based photodetector with other reported photodetectors.

| Materials            | Device configuration | Measure conditions                 | Responsivity ( $\mu\text{A W}^{-1}$ ) | Detectivity (Jones)   | Response time ( $\tau_r/\tau_f$ ) | Ref.      |
|----------------------|----------------------|------------------------------------|---------------------------------------|-----------------------|-----------------------------------|-----------|
| 2D GeP               | PEC                  | 0.5 M KOH, 0.6 V, SL               | 9.54                                  | $1.84 \times 10^5$    | $\sim 0.1/1$ s                    | This work |
| 2D GeP               | PEC                  | 0.5 M KOH, 0.6 V, 380 nm           | 187.5                                 | $2.14 \times 10^{12}$ | $\sim 0.1/1$ s                    | This work |
| BP                   | PEC                  | 0.1 M KOH, 0 V                     | 1.9–2.2                               | -                     | 0.5/1.1 s                         | 1         |
| InSe                 | PEC                  | 0.2 M KOH, 1 V                     | 3.3                                   | -                     | 5 s                               | 2         |
| Te                   | PEC                  | 0.1 M KOH, 0.6 V                   | 1.0–1.3                               | -                     | 70 ms                             | 3         |
| Bi                   | PEC                  | 1 M KOH, 0.5 V                     | 1.8                                   | -                     | 2/3 s                             | 4         |
| BP                   | Photodiode           | FET, $V_{ds} = 0.3$ V, $V_g = 0$ V | $4.8 \times 10^3$                     | -                     | 1 ms                              | 5         |
| GO                   | Photodiode           | FET, $V_{ds} = 1$ V                | $2.36 \times 10^4$                    | $3.31 \times 10^7$    | 100/105 ms                        | 6         |
| GQDs                 | Photoconductor       | 5 V, 254 nm                        | $2.1 \times 10^3$                     | $9.59 \times 10^{11}$ | 64/43 ms                          | 7         |
| ZnO nanocrystals     | Photoconductor       | 120 V, 370 nm                      | $6.1 \times 10^6$                     | -                     | $<0.1/1$ s                        | 8         |
| TiO <sub>2</sub>     | Photoconductor       | -5 V                               | $2.1 \times 10^7$                     | $1.71 \times 10^{12}$ | 33.4/ >60 s                       | 9         |
| TiO <sub>2</sub> NTs | Photoconductor       | 0.5 V, 312 nm                      | $1.3 \times 10^7$                     | -                     | 0.5/ 0.7 s                        | 10        |

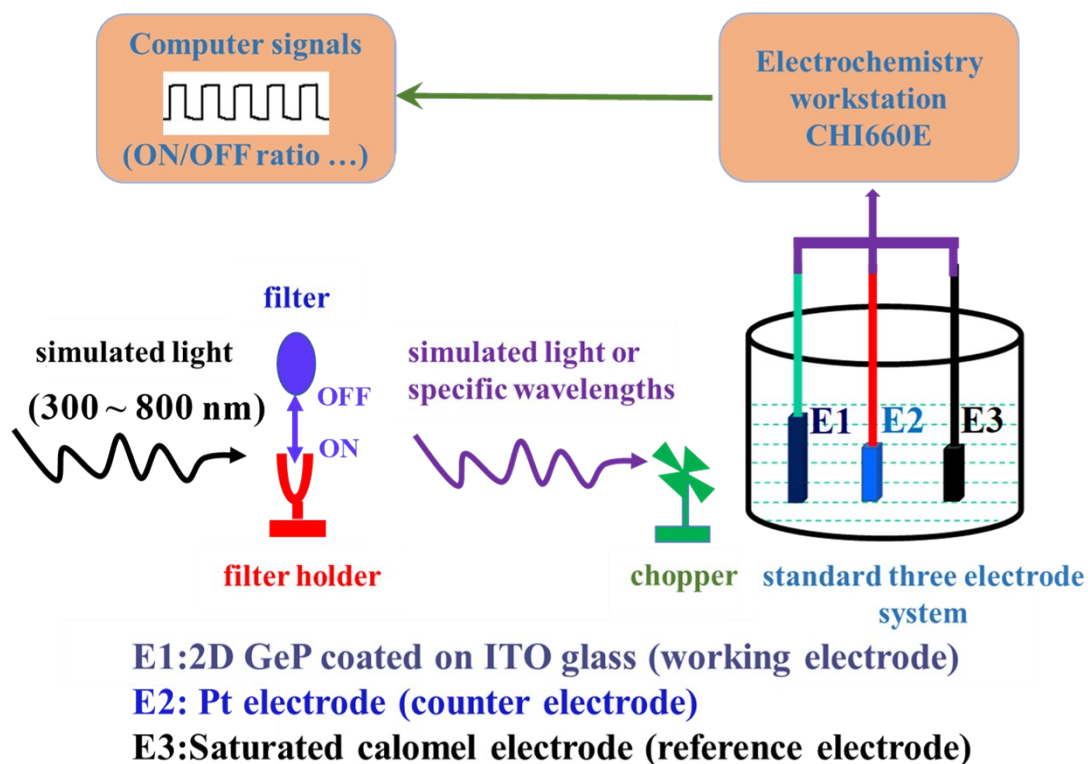

**Scheme S1.** A typical PEC system built for evaluating the photoresponse behavior of the 2D GeP-based photodetectors in different electrolytes.

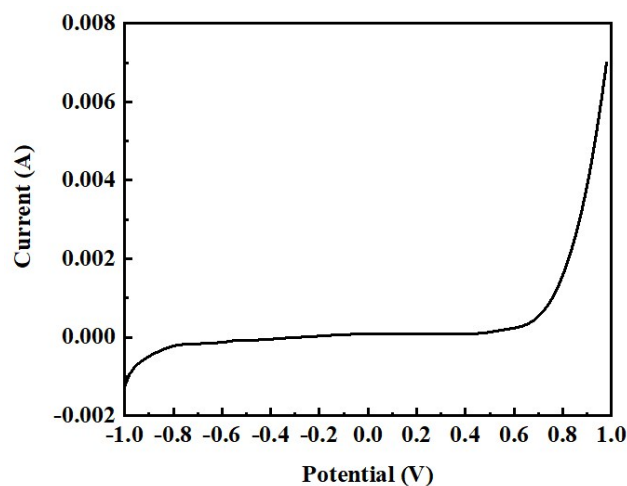

**Figure S1.** Linear sweep voltammetry curves of 2D GeP nanosheets-based photodetectors in 0.5 M KOH.

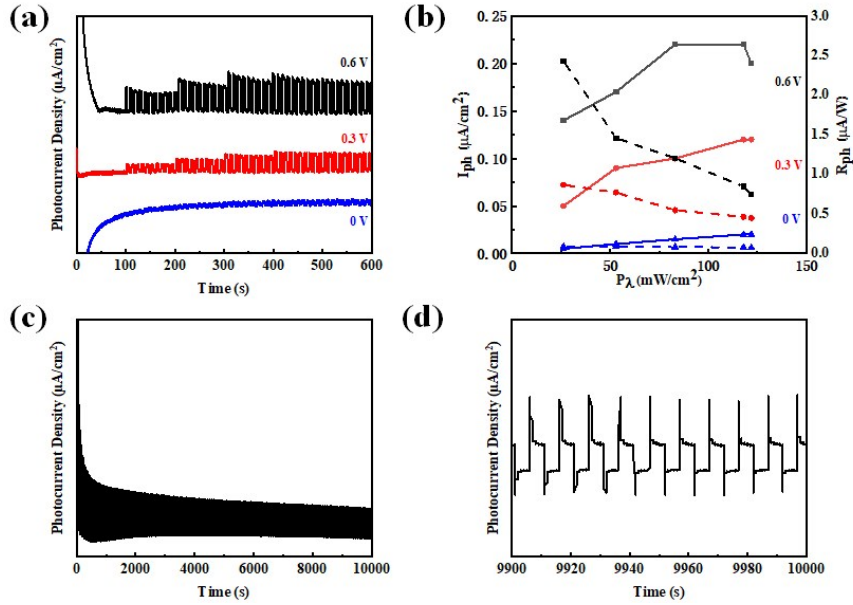

**Figure S2.** Typical photo-response behavior of the 2D GeP nanosheets-based photodetector in 0.5 M KCl under SL and irradiation with various wavelengths. (a) ON/OFF switching behavior triggered by SL with three selected applied potentials 0, 0.3 and 0.6 V; (b) Calculated photocurrent density (solid lines) and responsivity (dash lines) from (a); (c) Stability of photo-response behaviours of 2D GeP nanosheets-based photodetector with 10000 s cycles with 0.5 M KCl and at voltages of 0.6 V; (d) Enlarged last 100 s cycles of (c).

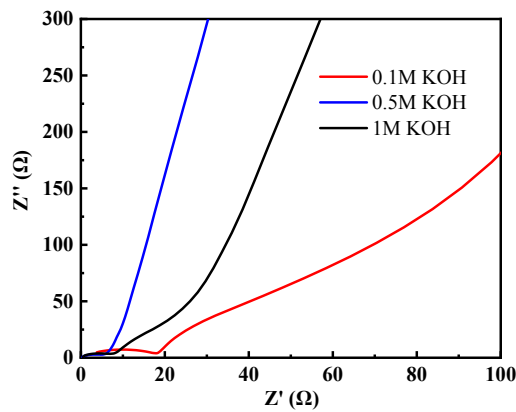

**Figure S3.** The impedance spectroscopic plots of 2D GeP nanosheets in different KOH electrolyte concentrations (0.1 M, 0.5 M, 1 M).

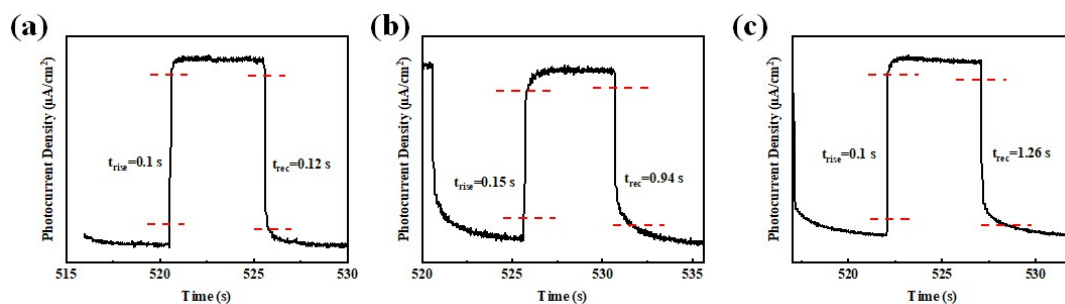

**Figure S4.** The photocurrent density versus time for the response ( $t_{\text{res}}$ ) and recovery ( $t_{\text{rec}}$ ) times of 2D GeP nanosheets in different KOH electrolyte concentrations (a) 0.1 M, (b) 0.5 M and (c) 1 M.

### Notes and references:

1. X. Ren, Z. Li, Z. Huang, D. Sang, H. Qiao, X. Qi, J. Li, J. Zhong and H. Zhang, *Adv. Funct. Mater.*, 2017, **27**, 1606834.
2. Z. Li, H. Qiao, Z. Guo, X. Ren, Z. Huang, X. Qi, S. C. Dhanabalan, J. S. Ponraj, D. Zhang, J. Li, J. Zhao, J. Zhong, H. Zhang, *Adv. Funct. Mater.*, 2018, **28**, 1705237.
3. Z. Xie, C. Xing, W. Huang, T. Fan, Z. Li, J. Zhao, Y. Xiang, Z. Guo, J. Li, Z. Yang, B. Dong, J. Qu, D. Fan, H. Zhang, *Adv. Funct. Mater.*, 2018, **28**, 1705833.
4. H. Huang, X. Ren, Z. Li, H. Wang, Z. Huang, H. Qiao, P. Tang, J. Zhao, W. Liang, Y. Ge, J. Liu, J. Li, X. Qi and H. Zhang, *Nanotechnology*, 2018, **29**, 235201.
5. M. Buscema, D. J. Groenendijk, S. I. Blanter, G. A. Steele, H. S. J. van der Zant, A. Castellanos-Gomez, *Nano Lett.*, 2014, **14**, 3347–3352.
6. S. K. Lai, L. Tang, Y. Y. Hui, C. M. Luk and S. P. Lau, *J. Mater. Chem. C*, 2014, **2**, 6971-6977.
7. Q. Zhang, J. Jie, S. Diao, Z. Shao, Q. Zhang, L. Wang, W. Deng, W. Hu, H. Xia, X. Yuan and S.-T. Lee, *ACS Nano*, 2015, **9**, 1561-1570.
8. Y. Jin, J. Wang, B. Sun, J. C. Blakesley and N. C. Greenham, *Nano Lett.*, 2008, **8**, 1649-1653.
9. W. Ouyang, F. Teng and X. Fang, *Adv. Funct. Mater.*, 2018, **28**, 1707178.
10. J. Zou, Q. Zhang, K. Huang and N. Marzari, *J. Phys. Chem. C*, 2010, **114**, 10725-10729.
